# Supplementary material for: Geographic Trends in Pediatric Psychotropic Medication Dispensing Before and After the Start of the COVID-19 Pandemic
Source: Atypon-hosted journal article supplement (doi:10.1176/appi.ps.20220314), 2023-02-08
Supplement: appi.ps.20220314.ds001.pdf [file appi.ps.20220314.ds001.pdf]

**Table S1. Agents included within each medication class**

| <b>Medication class</b>   | <b>Agents</b>                                                                                                                                                                                                                                                                                                                                                                                                                                                                                                   |
|---------------------------|-----------------------------------------------------------------------------------------------------------------------------------------------------------------------------------------------------------------------------------------------------------------------------------------------------------------------------------------------------------------------------------------------------------------------------------------------------------------------------------------------------------------|
| Antidepressants           | <p><u>SSRI</u>: Citalopram, escitalopram, fluoxetine, fluvoxamine, paroxetine, sertraline</p> <p><u>SNRI</u>: Desvenlafaxine, duloxetine, levomilnacipran, milnacipran, venlafaxine</p> <p><u>TCA</u>: Amitriptyline, amoxapine, clomipramine, desipramine, doxepin, imipramine, nortriptyline, protriptyline, trimipramine</p> <p><u>Other</u>: Bupropion, isocarboxazid, maprotiline, mirtazapine, nefazodone, phenelzine, selegiline (transdermal), tranylcypromine, trazodone, vilazodone, vortioxetine</p> |
| Antipsychotics            | <p><u>Atypical</u>: Aripiprazole, asenapine, brexpiprazole, cariprazine, clozapine, iloperidone, lumateperone, lurasidone, olanzapine, paliperidone, pimavanserin, quetiapine, risperidone, ziprasidone</p> <p><u>Typical</u>: Chlorpromazine, fluphenazine, haloperidol, loxapine, molindone, perphenazine, pimozide, thioridazine, thiothixene, trifluoperazine</p>                                                                                                                                           |
| ADHD medications          | <p><u>Alpha agonists</u>: Clonidine, guanfacine</p> <p><u>Stimulants</u>: Amphetamine, dextroamphetamine, dexamfetamine, lisdexamfetamine, methamphetamine, methylphenidate</p>                                                                                                                                                                                                                                                                                                                                 |
| Anxiolytics,<br>Sedatives | <p><u>Benzodiazepine</u>: alprazolam, chlordiazepoxide, clobazam, clonazepam, clorazepate, diazepam, estazolam, flurazepam, lorazepam, midazolam, oxazepam, quazepam, temazepam, triazolam</p> <p><u>Anxiolytic, Other</u>: buspirone, meprobamate</p> <p><u>Sedative, other</u>: (Z-drugs) eszopiclone, zaleplon, zolpidem; (barbiturates) butabarbital, pentobarbital, phenobarbital, secobarbital; (other) lemborexant, ramelteon, suvorexant</p>                                                            |

**Table S2. Sum and percent-change of psychotropic prescriptions dispensed to children and adolescents (5-18 years) from March through September 2020 versus March-September 2019**

|                                                     | Total prescriptions dispensed March through September |            | Difference (2020 vs. 2019) | Percent-change (2020 vs. 2019) <sup>a</sup> |
|-----------------------------------------------------|-------------------------------------------------------|------------|----------------------------|---------------------------------------------|
|                                                     | 2019                                                  | 2020       |                            |                                             |
| <b>Overall</b>                                      | 32,105,537                                            | 30,104,686 | -2,000,851                 | -6.2%                                       |
| ADHD medication                                     | 18,912,167                                            | 16,921,571 | -1,990,596                 | -10.5%                                      |
| Antidepressant                                      | 9,102,050                                             | 9,175,456  | 73,406                     | 0.8%                                        |
| Antipsychotics                                      | 2,850,843                                             | 2,831,776  | -19,067                    | -0.7%                                       |
| Sedatives, anxiolytics                              | 1,240,477                                             | 1,175,883  | -64,594                    | -5.2%                                       |
| <b>ADHD medication (stimulants, alpha agonists)</b> |                                                       |            |                            |                                             |
| New England                                         | 1,003,455                                             | 885,510    | -117,945                   | -11.8%                                      |
| Mid-Atlantic                                        | 2,034,581                                             | 1,833,701  | -200,880                   | -9.9%                                       |
| South-Atlantic                                      | 4,400,619                                             | 3,927,207  | -473,412                   | -10.8%                                      |
| East North Central                                  | 3,274,160                                             | 2,952,800  | -321,360                   | -9.8%                                       |
| East South Central                                  | 1,637,746                                             | 1,469,669  | -168,077                   | -10.3%                                      |
| West North Central                                  | 1,506,089                                             | 1,396,749  | -109,340                   | -7.3%                                       |
| West South Central                                  | 2,731,419                                             | 2,377,692  | -353,727                   | -13.0%                                      |
| Mountain                                            | 986,255                                               | 925,326    | -60,929                    | -6.2%                                       |
| Pacific                                             | 1,337,843                                             | 1,152,917  | -184,926                   | -13.8%                                      |
| <b>Antidepressants (SSRI, SNRI, TCA, other)</b>     |                                                       |            |                            |                                             |
| New England                                         | 579,522                                               | 556,249    | -23,273                    | -4.0%                                       |
| Mid-Atlantic                                        | 1,069,579                                             | 1,070,569  | 990                        | 0.1%                                        |
| South-Atlantic                                      | 1,646,195                                             | 1,689,573  | 43,378                     | 2.6%                                        |
| East North Central                                  | 1,632,727                                             | 1,628,901  | -3,826                     | -0.2%                                       |
| East South Central                                  | 600,674                                               | 611,502    | 10,828                     | 1.8%                                        |
| West North Central                                  | 897,173                                               | 935,600    | 38,427                     | 4.3%                                        |
| West South Central                                  | 1,108,396                                             | 1,126,876  | 18,480                     | 1.7%                                        |
| Mountain                                            | 683,307                                               | 701,223    | 17,916                     | 2.6%                                        |
| Pacific                                             | 884,477                                               | 854,963    | -29,514                    | -3.3%                                       |
| <b>Antipsychotics (atypical, typical)</b>           |                                                       |            |                            |                                             |
| New England                                         | 145,327                                               | 138,757    | -6,570                     | -4.5%                                       |
| Mid-Atlantic                                        | 347,721                                               | 339,226    | -8,495                     | -2.4%                                       |
| South-Atlantic                                      | 519,987                                               | 528,023    | 8,036                      | 1.5%                                        |
| East North Central                                  | 516,515                                               | 502,688    | -13,827                    | -2.7%                                       |
| East South Central                                  | 214,183                                               | 219,148    | 4,965                      | 2.3%                                        |
| West North Central                                  | 246,118                                               | 254,350    | 8,232                      | 3.3%                                        |
| West South Central                                  | 420,130                                               | 426,565    | 6,435                      | 1.5%                                        |
| Mountain                                            | 225,417                                               | 225,659    | 242                        | 0.1%                                        |
| Pacific                                             | 215,445                                               | 197,360    | -18,085                    | -8.4%                                       |
| <b>Sedatives, anxiolytics</b>                       |                                                       |            |                            |                                             |
| New England                                         | 63,113                                                | 57,966     | -5,147                     | -8.2%                                       |
| Mid-Atlantic                                        | 144,734                                               | 135,165    | -9,569                     | -6.6%                                       |
| South-Atlantic                                      | 265,436                                               | 253,509    | -11,927                    | -4.5%                                       |
| East North Central                                  | 208,743                                               | 201,662    | -7,081                     | -3.4%                                       |

|                    |         |         |         |        |
|--------------------|---------|---------|---------|--------|
| East South Central | 93,247  | 92,078  | -1,169  | -1.3%  |
| West North Central | 95,700  | 92,680  | -3,020  | -3.2%  |
| West South Central | 176,980 | 167,942 | -9,038  | -5.1%  |
| Mountain           | 80,296  | 76,132  | -4,164  | -5.2%  |
| Pacific            | 112,228 | 98,749  | -13,479 | -12.0% |

ADHD: Attention-deficit/hyperactivity disorder; SSRI: Selective serotonin reuptake inhibitor;

SNRI: Serotonin–norepinephrine reuptake inhibitor; TCA: Tricyclic antidepressants

<sup>a</sup>Percent-change = [(sum of dispensings from March to September 2020 - sum of dispensings from March to September 2019) / sum of dispensings from March to September 2019] \* 100

**Figure S1. Monthly percent change in prescription psychotropic medications dispensed to U.S. youths, 2020 vs. 2019**

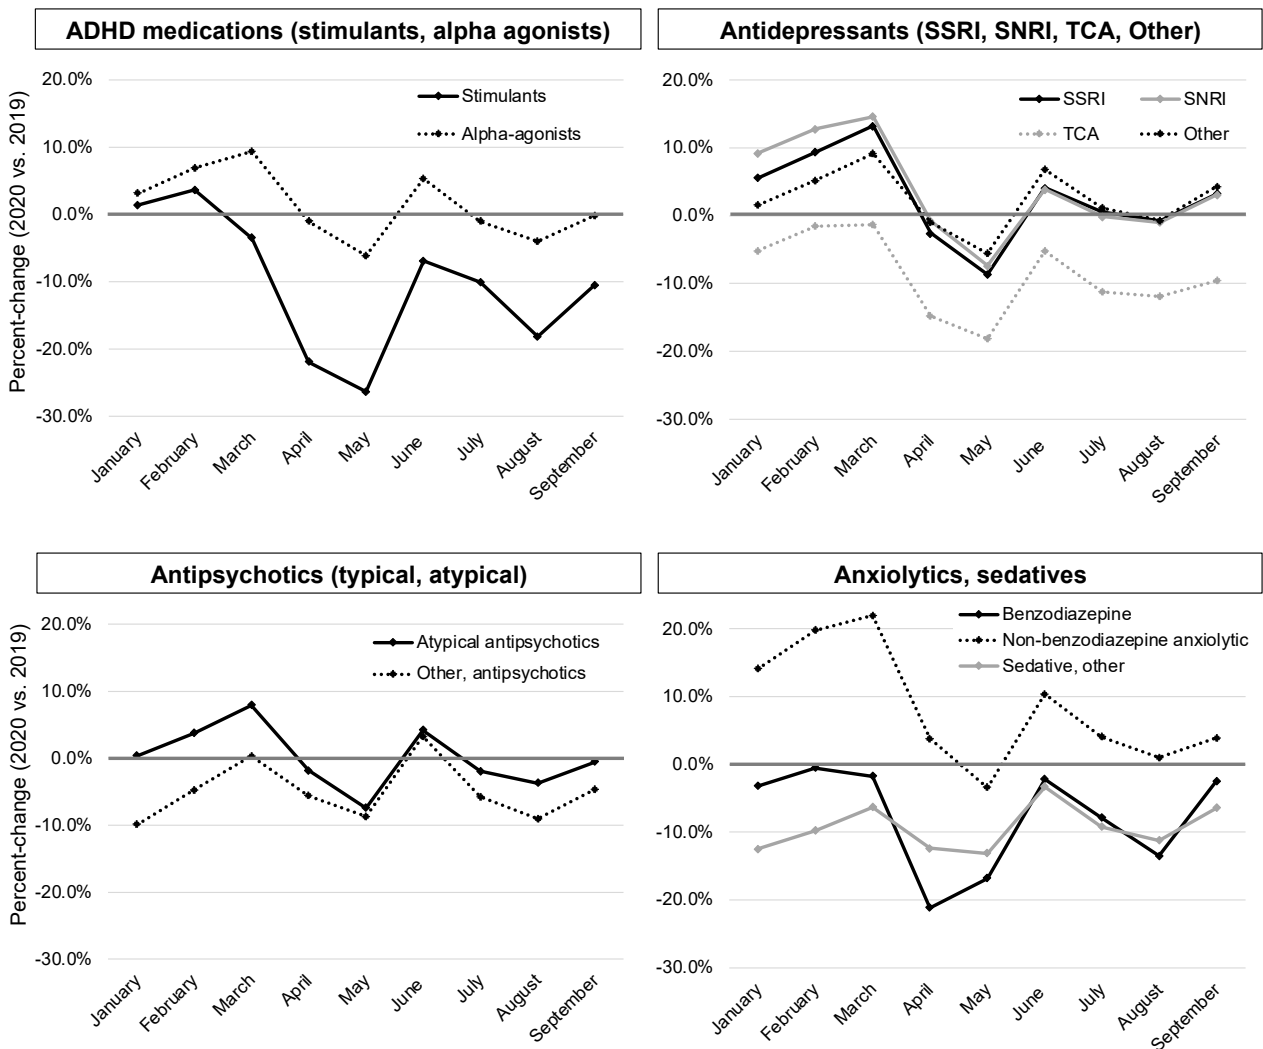

A negative percent change value indicates that fewer medications were dispensed during a given month in 2020 compared with the same month in 2019.

For reference, total prescription dispensing count in September 2020 by medication class: Stimulants, n=1,858,095; alpha-agonist, n=700,195; Selective serotonin reuptake inhibitors (SSRIs), n=975,476; Serotonin–norepinephrine reuptake inhibitors (SNRIs), n=78,061; Tricyclic antidepressants (TCAs), n=56,190; Other antidepressants, n=233,933; Atypical antipsychotics, n=392,314; Other, antipsychotics, n=7,395; Benzodiazepines, n=108,221; non-benzodiazepine anxiolytics, n=54,802; Sedative, other, n=14,315
